# Supplementary material for: PHA-4/FOXA-regulated microRNA feed forward loops during Caenorhabditis elegans dietary restriction
Source: Aging (Albany NY). 2014 Oct 31;6(10):835–51. doi: 10.18632/aging.100697 (PMC4247386; doi:10.18632/aging.100697)
Supplement: Supplementary file 2 [file aging-06-835-s002.xls]

## Sheet: Suppl Table 1
Table S1- Sequencing details and mapping summary for small RNA sequencing for Wild-type (WT) and eat-2(ad1116)
Strains	Life stage	Day	Total raw reads after adapter and length (>=15) trimming	Known miRNAs	Known 21U-RNAs	rRNAs	tRNAs	ncRNA	Unannotated reads	MiRNA with read counts >=1	MiRNA with read counts >=10
WT	Young-adult	1	19580536	18589066	500088	3228	3769	8859	475526	258	185
			1	0.9493	0.0255	0.0002	0.0002	0.0005	0.0243
eat-2(ad1116)	Young-adult	1	23581315	21422666	1254789	7647	6704	12013	877496	287	224
			1	0.9085	0.0532	0.0003	0.0003	0.0005	0.0372
WT	Aging	8	20040496	16167078	260689	4616	3965	31991	3572157	271	187
			1	0.8067	0.013	0.0002	0.0002	0.0016	0.1782
eat-2(ad1116)	Aging	8	19936035	18925714	293767	1490	1363	31421	682280	243	161
			1	0.9493	0.0147	0.0001	0.0001	0.0016	0.0342
daf-2(e1370)	Young-adult	1	40946564	38984081	1240710	218665	60499	14691	427918	273	215
			1	0.952	0.0303	0.0053	0.0014	3e-05	0.0104
